# Inhibition of FOXO3 Tumor Suppressor Function by $\beta$ TrCP1 through Ubiquitin-Mediated Degradation in a Tumor Mouse Model

Wen-Bin Tsai<sup>1</sup>\*, Young Min Chung<sup>2</sup>\*, Yiyu Zou<sup>3</sup>\*, See-Hyoung Park<sup>2</sup>, Zhaohui Xu<sup>4</sup>, Keiko Nakayama<sup>5</sup>, Sue-Hwa Lin<sup>1</sup>, Mickey C-T. Hu<sup>2\*</sup>

**1** Department of Molecular Pathology, University of Texas M. D. Anderson Cancer Center, Houston, Texas, United States of America, **2** Division of Gynecologic Oncology, Stanford University School of Medicine, Stanford, California, United States of America, **3** Department of Medicine, Albert Einstein College of Medicine, New York, New York, United States of America, **4** Department of Pediatrics-Infectious Disease, Baylor College of Medicine, Houston, Texas, United States of America, **5** Division of Developmental Genetics, Center for Translational and Advanced Animal Research on Human Diseases, Tohoku University Graduate School of Medicine, Miyagi, Japan

## Abstract

**Background:** The ubiquitin-proteasome system is the primary proteolysis machine for controlling protein stability of the majority of regulatory proteins including those that are critical for cancer development. The forkhead box transcription factor FOXO3 plays a key role in regulating tumor suppression; however, the control of FOXO3 protein stability remains to be established. It is crucial to elucidate the molecular mechanisms underlying the ubiquitin-mediated degradation of FOXO3 tumor suppressor.

**Methodology and Principal Findings:** Here we show that  $\beta$ TrCP1 oncogenic ubiquitin E3-ligase interacts with FOXO3 and induces its ubiquitin-dependent degradation in an I $\kappa$ B kinase- $\beta$  phosphorylation dependent manner. Silencing  $\beta$ TrCP1 augments FOXO3 protein level, resulting in promoting cellular apoptosis in cancer cells. In animal models, increasing FOXO3 protein level by silencing  $\beta$ TrCP1 suppresses tumorigenesis, whereas decreasing FOXO3 by over-expressing  $\beta$ TrCP1 promotes tumorigenesis and tumor growth *in vivo*.

**Conclusions/Significance:** This is a unique demonstration that the  $\beta$ TrCP1-mediated FOXO3 degradation plays a crucial role in tumorigenesis. These findings significantly contribute to understanding of the control of FOXO3 stability in cancer cells and may provide opportunities for developing innovative anticancer therapeutic modalities.

**Citation:** Tsai W-B, Chung YM, Zou Y, Park S-H, Xu Z, et al. (2010) Inhibition of FOXO3 Tumor Suppressor Function by  $\beta$ TrCP1 through Ubiquitin-Mediated Degradation in a Tumor Mouse Model. PLoS ONE 5(7): e11171. doi:10.1371/journal.pone.0011171

**Editor:** Alexander Swarbrick, Garvan Institute of Medical Research, Australia

**Received:** August 22, 2009; **Accepted:** May 16, 2010; **Published:** July 2, 2010

**Copyright:** © 2010 Tsai et al. This is an open-access article distributed under the terms of the Creative Commons Attribution License, which permits unrestricted use, distribution, and reproduction in any medium, provided the original author and source are credited.

**Funding:** This work was supported by National Institutes of Health grant R01CA113859 and Susan G. Komen for the Cure grant BCTR0504415 to MH. The funders had no role in study design, data collection and analysis, decision to publish, or preparation of the manuscript.

**Competing Interests:** The authors have declared that no competing interests exist.

\* E-mail: mhu1@stanford.edu

These authors contributed equally to this work.

## Introduction

FOXO3 (or FOXO3a) is a member of the forkhead box class O (FOXO) transcription factors which have been shown to play critical roles in modulating a number of cellular processes, such as metabolism, differentiation, and transformation in animal cells [1–7]. Strikingly, recent gene knockouts reveal FOXOs' vital functions in tumor suppression [8,9] and the maintenance of the hematopoietic stem cell pool [8,10,11]. Activation of FOXO factors was shown to regulate the expression of specific target genes that modulate the cell metabolic state, oxidative stress, aging [1,2,12], and those that control cell cycle progression including cyclin B and Polo-like kinase [13,14] and DNA damage [15–17].

While multiple mechanisms have been shown to regulate FOXO3 activity, there is a consensus that nuclear translocation of FOXO3 protein is critical to its regulation and function. Upon stimulation with growth factors, tyrosine kinase receptors trigger phosphoinositide 3-kinase (PI3K) to activate serine/threonine

kinases such as the Akt family of protein kinases that phosphorylate FOXO3 protein. Phosphorylated FOXO3 protein then binds to 14-3-3 proteins that facilitate the translocation of FOXO3 from the nucleus into the cytoplasm [1,2,18]. This nuclear exclusion and translocation of FOXO3 into the cytoplasm inhibits FOXO3-dependent transcription. In the absence of stimulation from survival signals, Akt is inactivated in quiescent cells, which results in retention of FOXO3 protein in the nucleus and activation of FOXO3-dependent transcription. Other kinases such as I $\kappa$ B kinase (IKK)- $\beta$  and JNK are also important in regulating nuclear exclusion of FOXO3, resulting in inhibition of FOXO3 function. Loss of function of FOXO3 through phosphorylation has been linked to tumorigenesis and poor patient survival in cancer, suggesting that FOXO3 is a key tumor suppressor [3,5,8,19].

In addition to phosphorylation, the protein degradation mechanism plays a key role in regulating FOXO3 tumor suppressor function. The ubiquitin (Ub)-proteasome pathway is

critical for regulating degradation of several tumor suppressors such as p53, retinoblastoma, and p27Kip1 proteins in cancer cells and the E3 Ub-ligases important for the Ub-mediated degradation of these proteins have been studied [20,21]. Interestingly, the FOXO3 protein stability is also regulated by the Ub-proteasome pathway [5,6,19]. However, the E3 Ub-ligases necessary for the Ub-mediated degradation of FOXO3 and their mechanisms are not well established. Thus, it is crucial to uncover the E3 Ub ligases required for FOXO3 protein degradation and elucidate their molecular mechanisms. Beta-transducin repeat-containing protein ( $\beta$ TrCP), a novel WD protein [22–26], is a unique E3 Ub-ligase that plays a major role in substrate recognition in certain Ub-proteasome pathways [26]. It has been shown that  $\beta$ TrCP1 (also called Fbw1a or FWD1, etc.) ubiquitinates substrates such as phosphorylated I $\kappa$ B [23] and  $\beta$ -catenin [25] and regulates various signaling pathways, which are important for tumorigenesis [26].

Here we show that  $\beta$ TrCP1 is a key E3 Ub-ligase that regulates the protein degradation of FOXO3 tumor suppressor.  $\beta$ TrCP1 interacts with FOXO3 and induces its Ub-dependent degradation in an IKK $\beta$ -phosphorylation dependent manner. Using animal models, we further show that downregulation of FOXO3 protein level by ectopic expression of  $\beta$ TrCP1 in breast cancer cells promotes tumor proliferation or tumorigenesis. In contrast, upregulation of FOXO3 protein level by knocking down the expression of  $\beta$ TrCP1 in breast cancer cells suppresses their tumor growth *in vivo*. These results suggest that  $\beta$ TrCP1 may inhibit FOXO3 activity through a novel Ub-mediated degradation mechanism. The important biological and pathological significance of this mechanism in the development of cancer is discussed.

## Results and Discussion

While we examined the expression of FOXO3 protein in various cancer cell lines, we unexpectedly found that the level of FOXO3 protein appeared to be inversely correlated with the level of  $\beta$ TrCP1 protein in various cancer cell lines (not shown), suggesting that  $\beta$ TrCP1 E3 Ub-ligase may contribute to a decrease of FOXO3. Consistently, over-expression of  $\beta$ TrCP1 reduced FOXO3 protein in 293T cells and this reduction could be reverted by treating cells with proteasome inhibitors such as MG-132 or clasto-lactacystin (Figure S1A), suggesting that  $\beta$ TrCP1 may decrease FOXO3 protein level through proteasomal degradation. Additionally, over-expression of mutant  $\beta$ TrCP1 $\Delta$ F-myc, which contains a deletion at the N-terminal F-box domain (a.a. 17–52) that abolishes its E3 ligase activity [26], increased the protein level of FOXO3 as compared to that in cells cotransfected with the FOXO3-Flag and  $\beta$ TrCP1-myc in the absence of proteasome inhibitor MG-132 (Figure S1B), suggesting that the expression of  $\beta$ TrCP1 $\Delta$ F may inhibit the degradation of FOXO3 protein mediated by endogenous  $\beta$ TrCP1.

To determine if  $\beta$ TrCP1 interacts with endogenous FOXO3 *in vivo*, we carried out co-immunoprecipitation (IP) with an antibody (Ab) against FOXO3 followed by immunoblotting (IB) analysis with an Ab against  $\beta$ TrCP1 or a reciprocal co-IP with an Ab against  $\beta$ TrCP1 followed by IB analysis with an anti-FOXO3 Ab. Indeed, endogenous FOXO3 protein was associated with  $\beta$ TrCP1 protein *in vivo* (Figure 1A). Using the co-transfection approach, we further confirmed that HA-FOXO3 protein was specifically associated with myc- $\beta$ TrCP1 protein in the transfected cells (Figure S2A,B).

Because the FOXO3 protein is targeted for proteasomal degradation after its phosphorylation in mammalian cells [5,6,19], we sought to determine whether phosphorylation of FOXO3 by IKK $\beta$  affects the protein level and ubiquitination (Ub) status of

FOXO3. Indeed, Ub of FOXO3 protein was enhanced significantly when FOXO3a-myc was co-transfected with HA-Ub and IKK $\beta$  in 293T cells in the absence of the IKK $\beta$  inhibitor (Figure 1B). Ub of FOXO3 was abrogated by a point mutation at Ser-644 (FOXO3-S644A-myc, whose Ser residue at 644 was mutated to Ala and resistant to IKK $\beta$  phosphorylation), suggesting that Ub of FOXO3 requires phosphorylation of FOXO3 at Ser-644 by IKK $\beta$ . To demonstrate the requirement for IKK $\beta$  activity in the Ub of FOXO3, we did experiments with the IKK $\beta$  inhibitor and showed that inhibition of IKK $\beta$  activity abrogated the Ub of FOXO3 in 293T cells (Figure 1B), suggesting that the Ub of FOXO3 is dependent on IKK $\beta$  activity. As controls, we showed the endogenous  $\beta$ TrCP1 expression in 293T cells by IB analysis (Figure 1B), suggesting that endogenous  $\beta$ TrCP1 is sufficient to facilitate IKK $\beta$ -mediated Ub of FOXO3 in 293T cells. In addition, we showed that the IKK $\beta$  inhibitor significantly repressed IKK $\beta$  activity in phosphorylation of its cellular substrate I $\kappa$ B and overrode the IKK $\beta$ -mediated FOXO3 degradation in the treated cells (Figure S3A-C). To confirm if over-expression of IKK $\beta$  induces FOXO3 protein degradation, we showed that co-transfection of FOXO3 with IKK $\beta$  into 293T cells resulted in reduction of the protein level of FOXO3 and this reducing effect could be overridden by treating cells with various proteasome inhibitors (Figure S2C), suggesting that IKK $\beta$  mediates proteasomal degradation of FOXO3 protein.

To determine whether  $\beta$ TrCP1 regulates the Ub status of FOXO3, we showed that Ub of FOXO3 was enhanced significantly when FOXO3-myc was co-transfected with HA-Ub plus  $\beta$ TrCP1 in 293T cells (Figure 1C), suggesting that  $\beta$ TrCP1 promotes Ub of FOXO3 *in vivo*. As controls, we showed the endogenous IKK $\beta$  expression in 293T cells by IB analysis (Figure 1C), suggesting that endogenous IKK $\beta$  is sufficient to facilitate the  $\beta$ TrCP1-induced Ub of FOXO3 in 293T cells. To demonstrate the requirement for  $\beta$ TrCP1 protein in the Ub of FOXO3, we did experiments with and without silencing of  $\beta$ TrCP1 by using  $\beta$ TrCP1-shRNA in the cotransfected 293T cells and showed that knockdown of  $\beta$ TrCP1 significantly attenuated the Ub of FOXO3 in these cells (Figure 1D), suggesting that the Ub of FOXO3 is dependent of  $\beta$ TrCP1 protein.

To titrate in transfected  $\beta$ TrCP1 and IKK $\beta$  to determine whether there are synergistic effects of these proteins on FOXO3 Ub, we showed that increasing in transfected  $\beta$ TrCP1 indeed enhanced the Ub of FOXO3 proportionally in cells cotransfected both  $\beta$ TrCP1 and IKK $\beta$  (Figure 1E). Similarly, we demonstrated that increasing in transfected IKK $\beta$  augmented the Ub of FOXO3 correspondingly in cells cotransfected both IKK $\beta$  and  $\beta$ TrCP1 (Figure 1F). These results imply that there may be an additive or synergistic effect of both proteins (IKK $\beta$  and  $\beta$ TrCP1) on FOXO3 Ub. However, we do not have definitive evidence to prove that the observed increase of FOXO3 Ub is due to synergistic effects of these proteins on FOXO3 Ub.

To show direct Ub of FOXO3 by  $\beta$ TrCP1 E3 Ub-ligase, we performed the *in vitro* Ub reactions and showed that  $\beta$ TrCP1 induced Ub of FOXO3 protein *in vitro* (Figure 1G). Although over-expression of the mutant  $\beta$ TrCP1 $\Delta$ F did not alter its binding to FOXO3 significantly (Figure S2A,B), Ub and degradation of FOXO3 protein were abrogated in the reactions using  $\beta$ TrCP1 $\Delta$ F defective in E3 activity (Figure 1H; Figure S1B), suggesting that Ub-mediated degradation of FOXO3 protein is directly consequential to the E3 activity of  $\beta$ TrCP1.

To confirm that the Ub-mediated FOXO3 protein degradation is mediated through  $\beta$ TrCP1, we compared the stability of FOXO3 protein in cells co-transfected with  $\beta$ TrCP1. Over-expression of  $\beta$ TrCP1 resulted in a rapid decrease in FOXO3 protein level (Figure 2A; Figure S4A), suggesting that  $\beta$ TrCP1

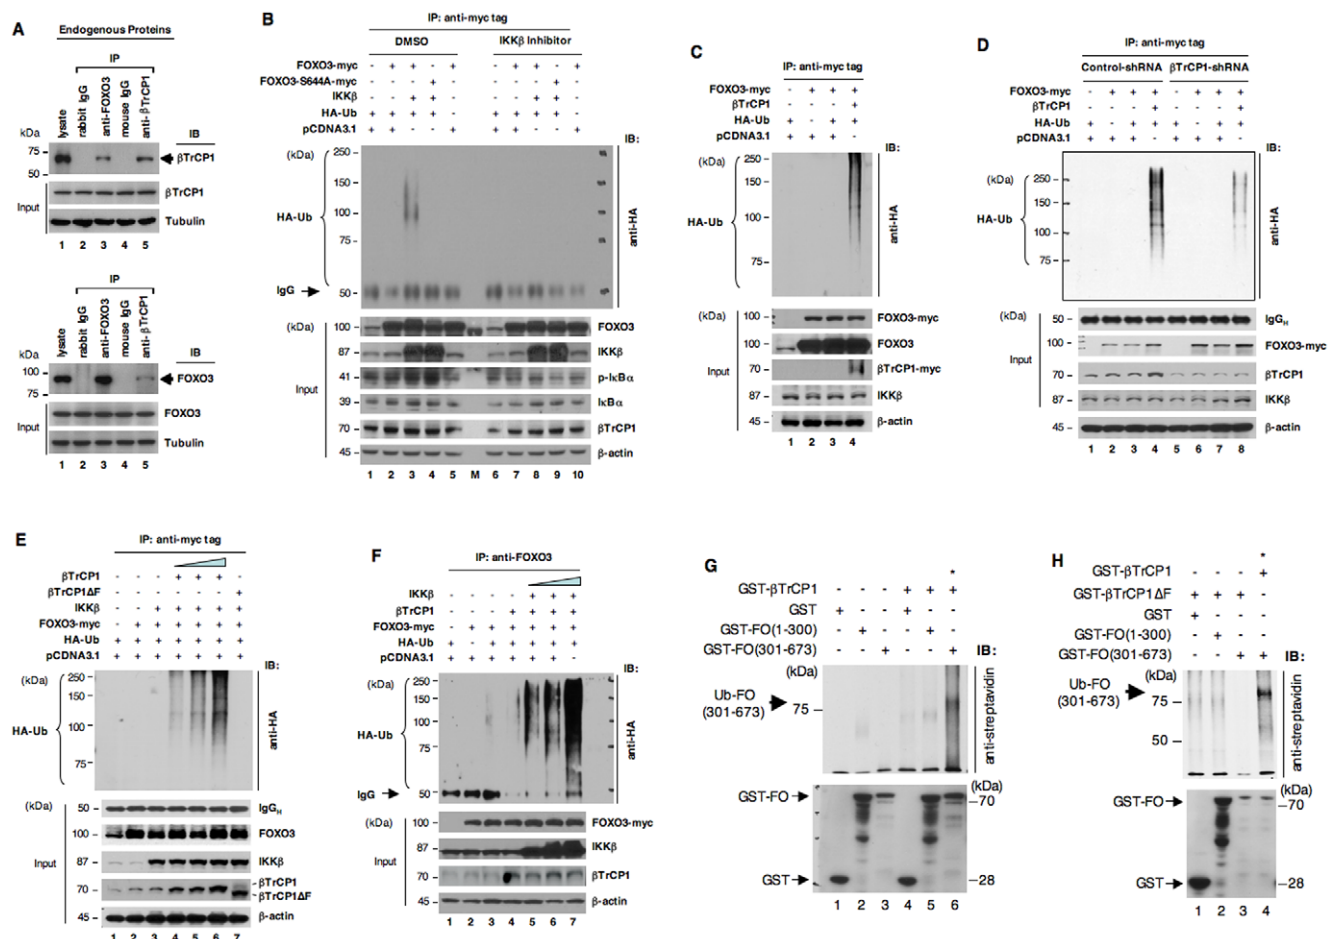

**Figure 1.  $\beta$ TrCP1 protein interacts with FOXO3 protein and induces its ubiquitination *in vivo* and *in vitro* in an IKK $\beta$ -phosphorylation dependent manner.** (A) Endogenous proteins in total lysates of MCF-7 cells were subjected to IP with an antibody (Ab) as indicated followed by immunoblotting (IB) with an anti- $\beta$ TrCP1 or anti-FOXO3 Ab. A rabbit IgG or an isotype mouse IgG were included as an IP negative control. The input IB data indicated the integrity of lysates used for IP. (B) 293T cells were cotransfected with HA-ubiquitin (Ub) and FOXO3-Myc or FOXO3-S644A expression vectors plus IKK $\beta$  or a control vector (pCDNA3.1) as indicated. At 24 hours after transfection, cells were treated with either DMSO (control) or the IKK $\beta$  inhibitor (2  $\mu$ M) plus the proteasome inhibitor MG-132 (10  $\mu$ M) for 5 hours. Total lysates were prepared and sonicated extensively for preventing non-covalent protein-protein associations, and subjected to IP with an anti-myc Ab and followed by IB analysis with an anti-HA Ab. The typical pattern of HA-tagged Ub was highlighted. The input IB data were performed with Abs against FOXO3, IKK $\beta$ , phospho-IkB $\alpha$  (p-IkB $\alpha$ ), IkB $\alpha$ ,  $\beta$ TrCP1, and  $\beta$ -actin to show the expressions of transfected vectors in cells as indicated, the effect of the IKK $\beta$  inhibitor (as indicated by the repression of p-IkB $\alpha$  level), and the integrity of each protein in total lysates used for IP. (C) IP was performed with the lysates of 293T cells that were cotransfected with the expression vectors as indicated, treated with MG-132 as described above, and followed by IB with an anti-HA Ab. The input IB data were performed with Abs against myc-tag, FOXO3,  $\beta$ TrCP1, IKK $\beta$ , and  $\beta$ -actin to show the expressions of transfected vectors in cells and the integrity of lysates used for IP. (D) Firstly, 293T cells were transfected with either control-shRNA or  $\beta$ TrCP1-shRNA vectors. Twenty four hours post transfection, these cells were cotransfected with the expression vectors as indicated. Then, at 24 hours after cotransfection, cells were treated with MG-132 (20  $\mu$ M) for 4 hours. The total lysates of these 293T cells were prepared and IP was performed as described above and followed by IB with an anti-HA Ab. The input IB data were performed with Abs against myc-tag,  $\beta$ TrCP1, IKK $\beta$ , and  $\beta$ -actin as described. (E) 293T cells were cotransfected with various doses of  $\beta$ TrCP1 expression vector and mutant  $\beta$ TrCP1 $\Delta$ F vector and other expression vectors as indicated. IP was performed with the lysates of these transfected 293T cells, treated with MG-132 as described above, and followed by IB with an anti-HA Ab. The input IB data were performed with Abs against FOXO3, IKK $\beta$ ,  $\beta$ TrCP1, and  $\beta$ -actin to show the expressions of transfected vectors and endogenous proteins in transfected cells and the integrity of lysates used for IP. (F) 293T cells were cotransfected with various doses of IKK $\beta$  expression vector and other expression vectors as indicated. IP was performed with the lysates of these transfected 293T cells, treated with MG-132, and followed by IB with an anti-HA Ab as described above. The input IB data were performed with the indicated Abs as described above. (G) *In vitro* ubiquitination assays. The indicated target proteins GST-FO(1-300), GST-FO(301-673), and GST (negative control) were incubated with or without E3-ligase protein GST- $\beta$ TrCP1 in Ub buffer containing E1, E2 (Ubch5b), Mg-ATP, biotinylated ubiquitin, and IKK $\beta$  and analyzed by SDS-PAGE and IB with streptavidin conjugated with HRP or an anti-GST Ab as protein controls (lower panel). (H) The indicated target proteins were incubated with wild-type E3-ligase protein GST- $\beta$ TrCP1 or mutant GST- $\beta$ TrCP1 $\Delta$ F in Ub buffer, and analyzed as described above. The positive signals are highlighted with \*.

doi:10.1371/journal.pone.0011171.g001

plays a crucial role in the degradation of FOXO3. We estimated that the half-life of FOXO3 is around 4 hours in cells over-expressing  $\beta$ TrCP1. In addition, silencing  $\beta$ TrCP1 in MCF-7 cells markedly increased FOXO3 protein (Figure 2B). Furthermore, mouse embryonic fibroblasts (MEF) lacking  $\beta$ TrCP1 also

augmented the expression of FOXO3 protein (Figure 2C,D), suggesting that  $\beta$ TrCP1 may be essential for the Ub-mediated degradation of FOXO3.

As controls, we showed that MCF-7 and MEF cells express similar levels of IKK $\beta$  protein (Figure S4B-D). It should be noted

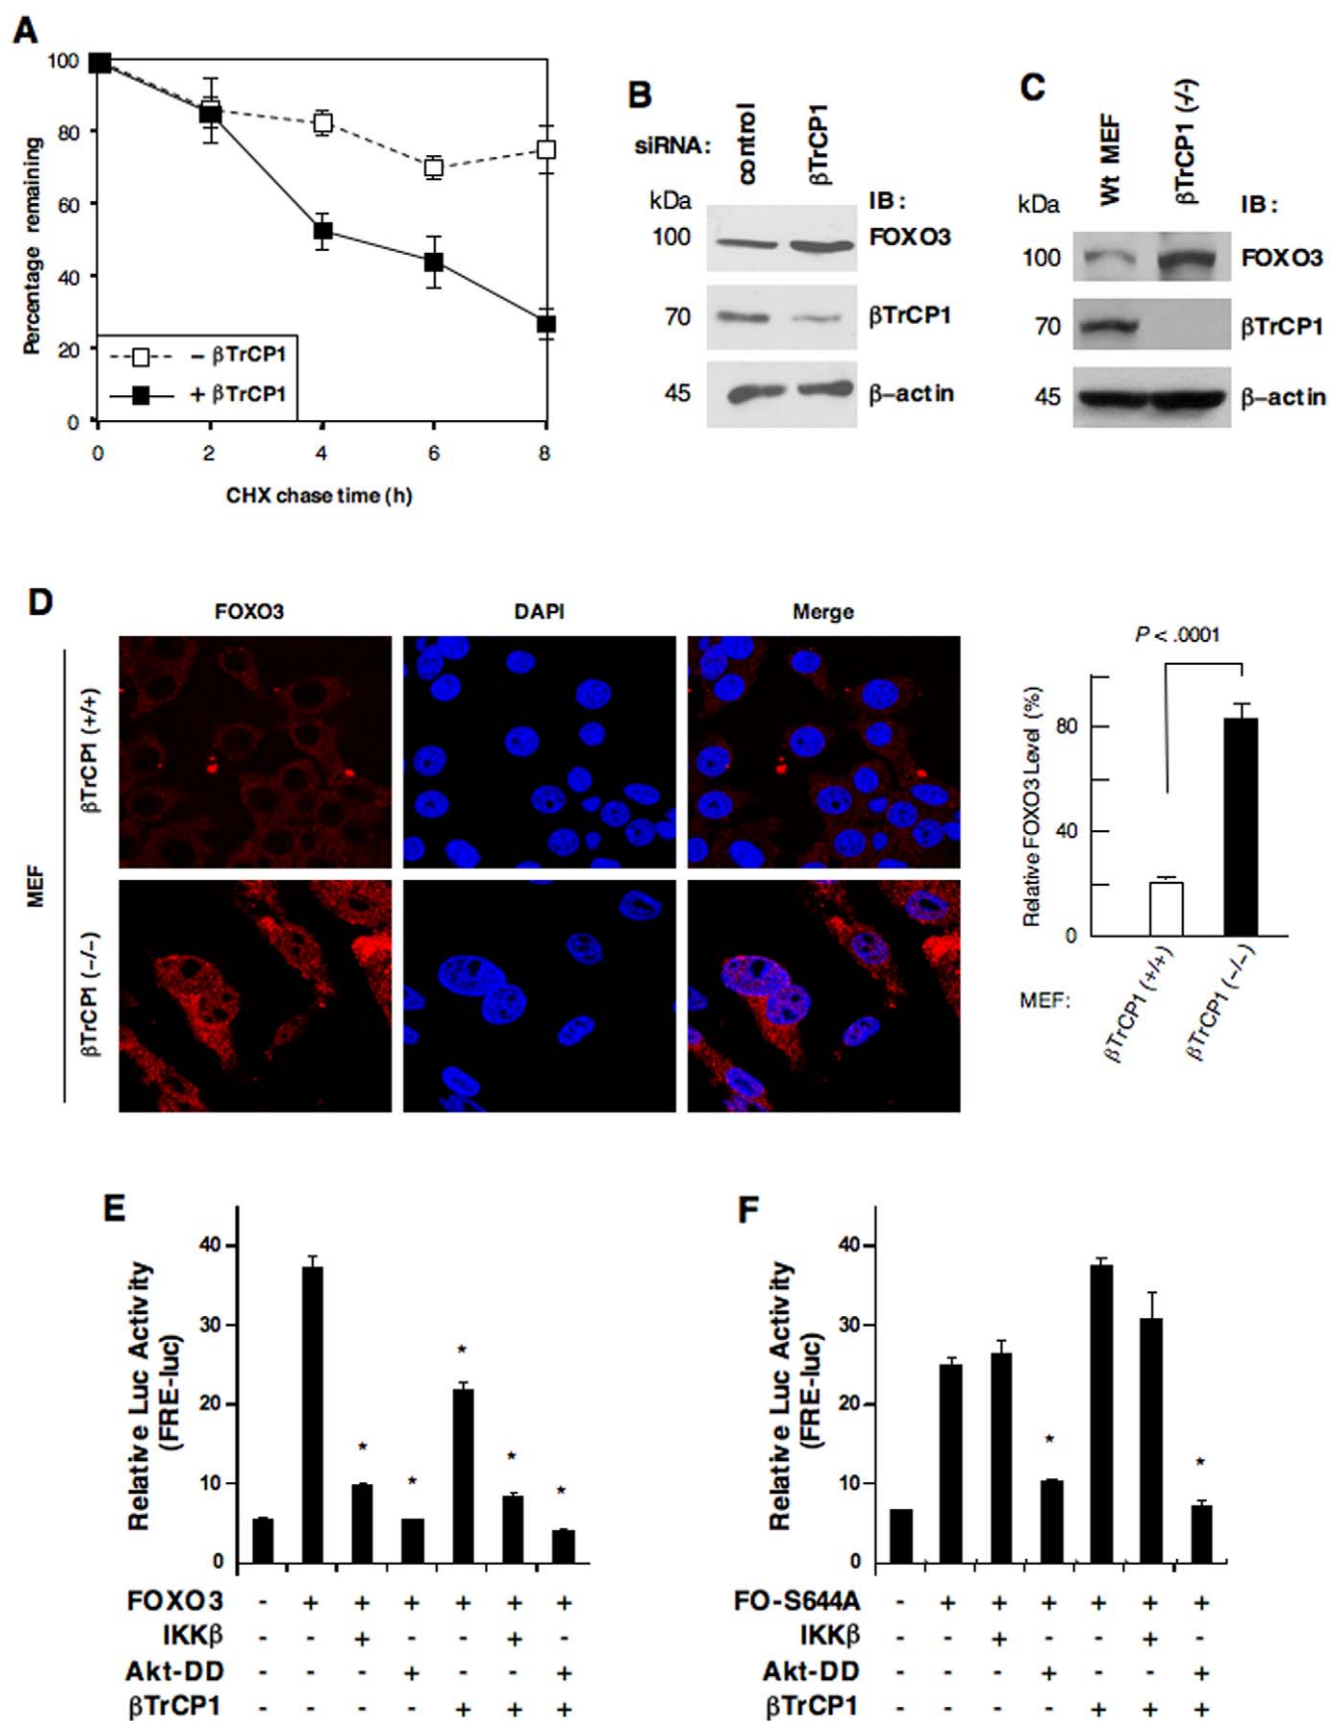

**Figure 2.  $\beta$ TrCP1 induces degradation of FOXO3 protein and inhibits its transactivating activity.** (A) The stability of FOXO3 protein was assayed by cycloheximide (CHX) chase in 293T cells co-transfected with FOXO3-myc and  $\beta$ TrCP1 or a control vector (pCDNA3.1). Lysates of the transfected cells were prepared at 2, 4, 6, 8 hour (h) and 0 h (control) after addition of CHX, and subjected to immunoblotting (IB) with an anti-myc Ab. Graph shows results of densitometric analysis of 3 CHX chase experiments (mean  $\pm$  SD) using 0 h (control) as 100%. (B) MCF-7 cells were transfected with small interfering RNA (siRNA) targeting  $\beta$ TrCP1 or control-siRNA (control). Total lysates of the transfected cells were subjected to IB analysis with an Ab against  $\beta$ TrCP1 or FOXO3 or  $\beta$ -actin (loading control) as indicated. (C) Total lysates of wild-type (Wt) and  $\beta$ TrCP1(–/–) MEF cells were subjected to IB analysis with an Ab against FOXO3 or  $\beta$ TrCP1 or  $\beta$ -actin (loading control). (D)  $\beta$ TrCP1(–/–) and  $\beta$ TrCP1(+ / +) MEF cells were fixed, and the expression and subcellular localization of endogenous FOXO3 was detected using an anti-FOXO3 Ab and followed by an Alexa Fluor 546 (red) -conjugated secondary Ab, and analyzed with fluorescence microscopy. A fluorescent dye 4',6-Diamidino-2-phenylindole (DAPI) was used to visualize the nuclei. An average of  $\sim$ 200 cells stained with anti-FOXO3 Ab were analyzed and a histogram shows the relative FOXO3 expression level in MEF cells. (E and F) Total lysates of 293T cells cotransfected with FRET-luc (firefly luciferase (luc) reporter containing FOXO-responsive elements), pRL-TK (renilla luc as a transfection control for normalization),  $\beta$ TrCP1, FOXO3 (A) or FOXO3-S644A (FO-S644A) (B), plus IKK $\beta$  or Akt-DD (an active Akt) as indicated and subjected to luc assays.

doi:10.1371/journal.pone.0011171.g002

that FOXO3 does not seem to be degraded by endogenous  $\beta$ TrCP1 rapidly in 293T cells under normal conditions. Because the activity of IKK $\beta$  is usually regulated by certain inflammatory cytokines such as tumor necrosis factor- $\alpha$  or other oncogenic factors, it is possible that FOXO3 is not subjected to fast degradation in the absence of overexpressed  $\beta$ TrCP1 due to the absence of constitutive phosphorylation of FOXO3 by IKK $\beta$  under normal conditions.

Next, we sought to determine whether the  $\beta$ TrCP1-promoted, IKK $\beta$ -dependent, degradation of FOXO3 affects its transactivational activity. Using the reporter co-transfection assays, we showed that ectopic expression of  $\beta$ TrCP1 resulted in a significant ( $\sim$ 40%) decrease in FOXO3 transactivational activity (Figure 2E). The mutation of FOXO3 at Ser-644 abrogated the inhibitory effect of IKK $\beta$  on the activity of FOXO3 while expression of Akt-DD resulted in a marked decrease in the activity of FOXO3-S644A (Figure 2F). In contrast to the wild-type (wt) FOXO3, overexpression of  $\beta$ TrCP1 could not facilitate the IKK $\beta$ -mediated inhibition of mutant FOXO3-S644A.

To elucidate the biochemical mechanism underlying the  $\beta$ TrCP1-mediated degradation of FOXO3, we examined the binding between FOXO3 and  $\beta$ TrCP1 by using GST pull-down assays. We found that  $\beta$ TrCP1 bound FOXO3 mainly at the C-terminal portion [amino acid (a.a.) 301–673] (Figure 3A). Further mapping showed that  $\beta$ TrCP1 bound FOXO3 primarily at the C-terminal domain (a.a. 626–673) and, to a lesser extent, at an adjacent domain (a.a. 579–625) and a distant domain (a.a. 301–346) of FOXO3 (Figure 3B; Figure S5A). In addition to the Ser-644 residue in the C-terminal domain (a.a. 626–673), we identified a new candidate IKK $\beta$  phosphorylation motif containing Ser-586 and Ser-590 in the adjacent domain (a.a. 579–625) (Figure S5B). Using *in vitro* kinase assays, we showed that these two Ser residues could be phosphorylated by IKK $\beta$  whereas mutation of these two Ser residues to Ala residues abolished phosphorylation by IKK $\beta$  (Figure 3C), suggesting that Ser-586 and Ser-590 are indeed new IKK $\beta$  phosphorylation sites. Interestingly, mutations of all these sites (Ser-586, -590, and -644) in the C-terminal domain of FOXO3-(301–673) GST fusion protein abrogated the interaction between  $\beta$ TrCP1 and FOXO3-(301–673)AAA (Figure 3D), suggesting that phosphorylation of these sites by IKK $\beta$  may be crucial for promoting  $\beta$ TrCP1 binding to FOXO3.

It should be noted that  $\beta$ TrCP1 appears to bind to the 301–346 domain of FOXO3 also. It has been well established that  $\beta$ TrCP1 binds to its substrates through the consensus degron domain “DSGxxS,” where both serines (S) are phosphorylated by kinases [26]. However, the 301–346 domain of FOXO3 does not contain such a motif, suggesting that this binding may be independent of serine phosphorylation and IKK $\beta$ -mediated phosphorylation. Although it is interesting that  $\beta$ TrCP1 binds to a site of FOXO3 lacking the degron motif, details of the mechanism underlying the

interaction between  $\beta$ TrCP1 and FOXO3 through a phosphorylation-independent manner remain to be elucidated.

Next, we determined the subcellular localizations of  $\beta$ TrCP1 and FOXO3 proteins and whether endogenous FOXO3 was co-localized with  $\beta$ TrCP1 in cancer cells. Using fluorescence microscopy, we showed that  $\beta$ TrCP1 protein is mainly localized in the nucleus of MCF-7 cells without treatment with any proteasome inhibitor by using the specific anti- $\beta$ TrCP1 polyclonal Ab [22], kindly provided by Klaus Strebel (at NIH). However,  $\beta$ TrCP1 can be clearly detected in the cytoplasm also (Figure 3E). Although endogenous FOXO3 protein was located more in the cytoplasm than nucleus under the same conditions, the majority of FOXO3 was co-localized with  $\beta$ TrCP1 protein in the cytoplasm of MCF-7 cells (Figure 3E). In contrast, the treatment with the IKK $\beta$  inhibitor,  $\beta$ TrCP1 is predominantly detected in the nucleus with this anti- $\beta$ TrCP1 (NIH) Ab and FOXO3 is also primarily localized in the nucleus (Figure 3F). In addition, we have provided data showing similar subcellular localization of endogenous  $\beta$ TrCP1 in BT-549 cells using this specific anti- $\beta$ TrCP1 Ab (Figure S6A).

Since it has been shown that  $\beta$ TrCP1 is mainly localized in the nucleus [22–26], we sought to rule out the possibility that the observed partial cytoplasmic localization of  $\beta$ TrCP1 may be due to an antibody artifact. To confirm subcellular localization of overexpressed  $\beta$ TrCP1-myc (myc tagged) in different cell types, we transfected MCF-7 and 293T cells with the  $\beta$ TrCP1-myc expression vector and performed immuno-fluorescence (IF) analysis with an anti-myc tag Ab and this specific anti- $\beta$ TrCP1 (NIH) Ab. In agreement with the previous results, our new data showed that the IF images of both anti-myc and anti- $\beta$ TrCP1 (NIH) Abs are colocalized mainly in the nucleus but they can be detected in the cytoplasm, at a relatively lower level, reproducibly (Figure S6B,C), suggesting that some  $\beta$ TrCP1 may be truly localized in the cytoplasm under normal conditions. In fact, these results are consistent with the previously published reports [24,25].

Recently, multiple isoforms of  $\beta$ TrCP1 and  $\beta$ TrCP2 derived from alternative splicing have been found to display differential activities in the regulation of Wnt signaling in MCF-7 cells [27], where  $\beta$ TrCP1-mediated degradation of  $\beta$ -catenin mainly occurs in the cytoplasm [25]. Interestingly, some isoforms of  $\beta$ TrCP1 are localized in both cytoplasm and nuclei (i.e., isoforms “f” and “o” [27]). As most anti- $\beta$ TrCP1 polyclonal Abs cannot distinguish those isoforms of  $\beta$ TrCP1, it is plausible that some  $\beta$ TrCP1 proteins detected in the cytoplasm by the specific anti- $\beta$ TrCP1 Ab may represent certain isoforms such as “f” and “o” of  $\beta$ TrCP1.

In agreement with previous reports [1–3,5,19], phosphorylated FOXO3 is mainly localized in the cytoplasm. Using IF analysis, we further confirm that serine (Ser) residues of FOXO3 proteins were phosphorylated in 293T and MCF-7 cells cotransfected with FOXO3-HA (or FOXO3-myc) plus IKK $\beta$  vectors and primarily

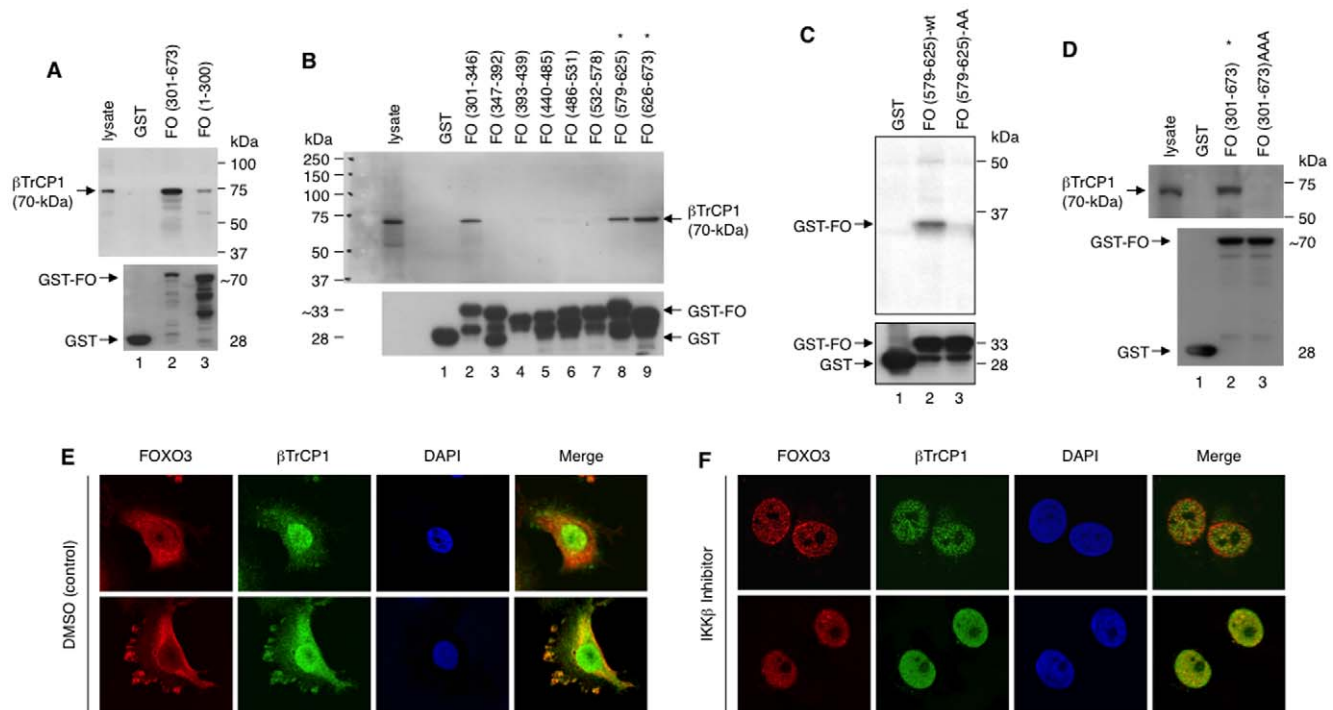

**Figure 3. FOXO3 protein is associated and co-localized with  $\beta$ TrCP1 protein and inhibition of IKK $\beta$  abolishes co-localization of FOXO3 with  $\beta$ TrCP1 in cells.** (A) GST-pull down *in vitro* assays. Whole lysates from 293T cells overexpression of IKK $\beta$  were incubated with the GST-FOXO3 [GST-FO (1–300) and GST-FO (301–673)] fusion proteins as indicated and GST alone (negative control), and analyzed by SDS-PAGE and immunoblotting (IB) with an anti- $\beta$ TrCP1 Ab (upper panel) and an anti-GST Ab as protein controls (lower panel). (B) The same lysates were incubated with the eight GST-FO sequential fusion fragments spanning the entire carboxy (C)-terminal region of FOXO3 (301–673) as indicated and GST, and analyzed as described. (C) *In vitro* kinase assays. Lysates of 293T transfected with HA-IKK $\beta$  were IP with an anti-HA, and kinase assays were performed with fusion proteins GST-FO (579–625) and GST-FO (579–625)-AA, whose Ser-586 and Ser-590 residues were mutated to Ala (A) residues, and GST protein (negative control). (D) Lysates from 293T cells were incubated with fusion proteins GST-FO (301–673) and GST-FO (301–673)AAA, whose Ser-586, Ser-590, and Ser-644 residues were mutated to Ala residues in the C-terminal domain of FOXO3, and GST protein, and analyzed by IB with an anti- $\beta$ TrCP1 Ab (upper panel) and an anti-GST Ab (lower panel). The significant signal is indicated with \*. (E) MCF-7 cells were treated with DMSO (control vehicle for the IKK $\beta$  inhibitor shown in F below) or untreated, fixed, and the subcellular localizations and co-localization of endogenous FOXO3 and  $\beta$ TrCP1 proteins were detected using an anti-FOXO3 and a specific anti- $\beta$ TrCP1 Ab (obtained from K. Strebels at NIH) [22] and followed by an Alexa Fluor 594- or 488-conjugated secondary Ab, respectively, and fluorescence microscopy. DAPI was used to show the nuclei, and co-localization of FOXO3 with  $\beta$ TrCP1 was shown as the merged images (yellow). These results are the same as those untreated cells. (F) MCF-7 cells were treated with the IKK $\beta$  inhibitor (2  $\mu$ M), fixed, and the subcellular localizations and co-localization of endogenous FOXO3 and  $\beta$ TrCP1 proteins were detected using Abs against FOXO3 and  $\beta$ TrCP1 (NIH) as described above and followed by an Alexa Fluor 594- or 488-conjugated secondary Ab, respectively, and fluorescence microscopy. DAPI was used to show the nuclei, and no co-localization (the merged yellow images) between nuclear FOXO3 and cytoplasmic  $\beta$ TrCP1 was detected.

doi:10.1371/journal.pone.0011171.g003

localized in the cytoplasm (Figure S7B,D), whereas the mutant FOXO3-S644A protein was predominantly localized in the nucleus even in cells overexpressed IKK $\beta$  (Figure S8A). As controls, we showed that mutant FOXO3-S644A protein was also primarily localized in the nucleus in cells without IKK $\beta$  overexpression (Figure S8B). In contrast, we showed that wt FOXO3-HA protein was primarily colocalized with IKK $\beta$  in the cytoplasm of cells overexpressed IKK $\beta$  (Figure S8C) while wt FOXO3-HA could be detected in the cytoplasm and nucleus without IKK $\beta$  overexpression (Figure S8D).

As cells express a homolog of  $\beta$ TrCP1 ( $\beta$ TrCP2), we examined if  $\beta$ TrCP2 protein could interact with FOXO3 protein *in vitro* and *in vivo*. Using GST pull-down assays, we showed that  $\beta$ TrCP2 protein could not bind to FOXO3 protein directly *in vitro* (Figure S9A). Using IF analysis, we showed that  $\beta$ TrCP2 protein could be detected in both the cytoplasm and nucleus while FOXO3 protein was primarily located in the cytoplasm (Figure S9B). Although it appears that  $\beta$ TrCP2 may be localized somewhat more in the nucleus than cytoplasm, it is possible that some isoforms of  $\beta$ TrCP2 [27], as described above, are located more in the nucleus

than cytoplasm. Thus, it is probable that FOXO3 protein may not be co-localized with  $\beta$ TrCP2 in cells under normal conditions (Figure S9B). Collectively, these data suggest that the Ub-mediated FOXO3 protein degradation is mainly mediated through  $\beta$ TrCP1 but may not be regulated by  $\beta$ TrCP2. These results further suggest that cells in which  $\beta$ TrCP1 is silenced alone and  $\beta$ TrCP1(–/–) MEFs express high levels of FOXO3 protein.

Moreover, we determined if this increase of FOXO3 protein by silencing  $\beta$ TrCP1 would affect cell survival or death after DNA damage. We showed that exposure of  $\beta$ TrCP1(–/–) MEF cells to camptothecin (CPT), a topoisomerase I inhibitor, for 48 hours led to cellular apoptosis, whereas wt MEFs did not have significant apoptosis (Figure 4A,B). As described above, silencing  $\beta$ TrCP1 increased FOXO3 protein significantly (Figure 2B–D), suggesting that the observed pro-apoptotic phenotype in cells lacking  $\beta$ TrCP1 may be mediated via FOXO3 increase. To further confirm that the apoptotic effect from silencing  $\beta$ TrCP1 was mediated via FOXO3, we showed that silencing both FOXO3 and  $\beta$ TrCP1 together (double knockdown) in BT549 cells abrogated the effect of apoptosis induced by  $\beta$ TrCP1 single

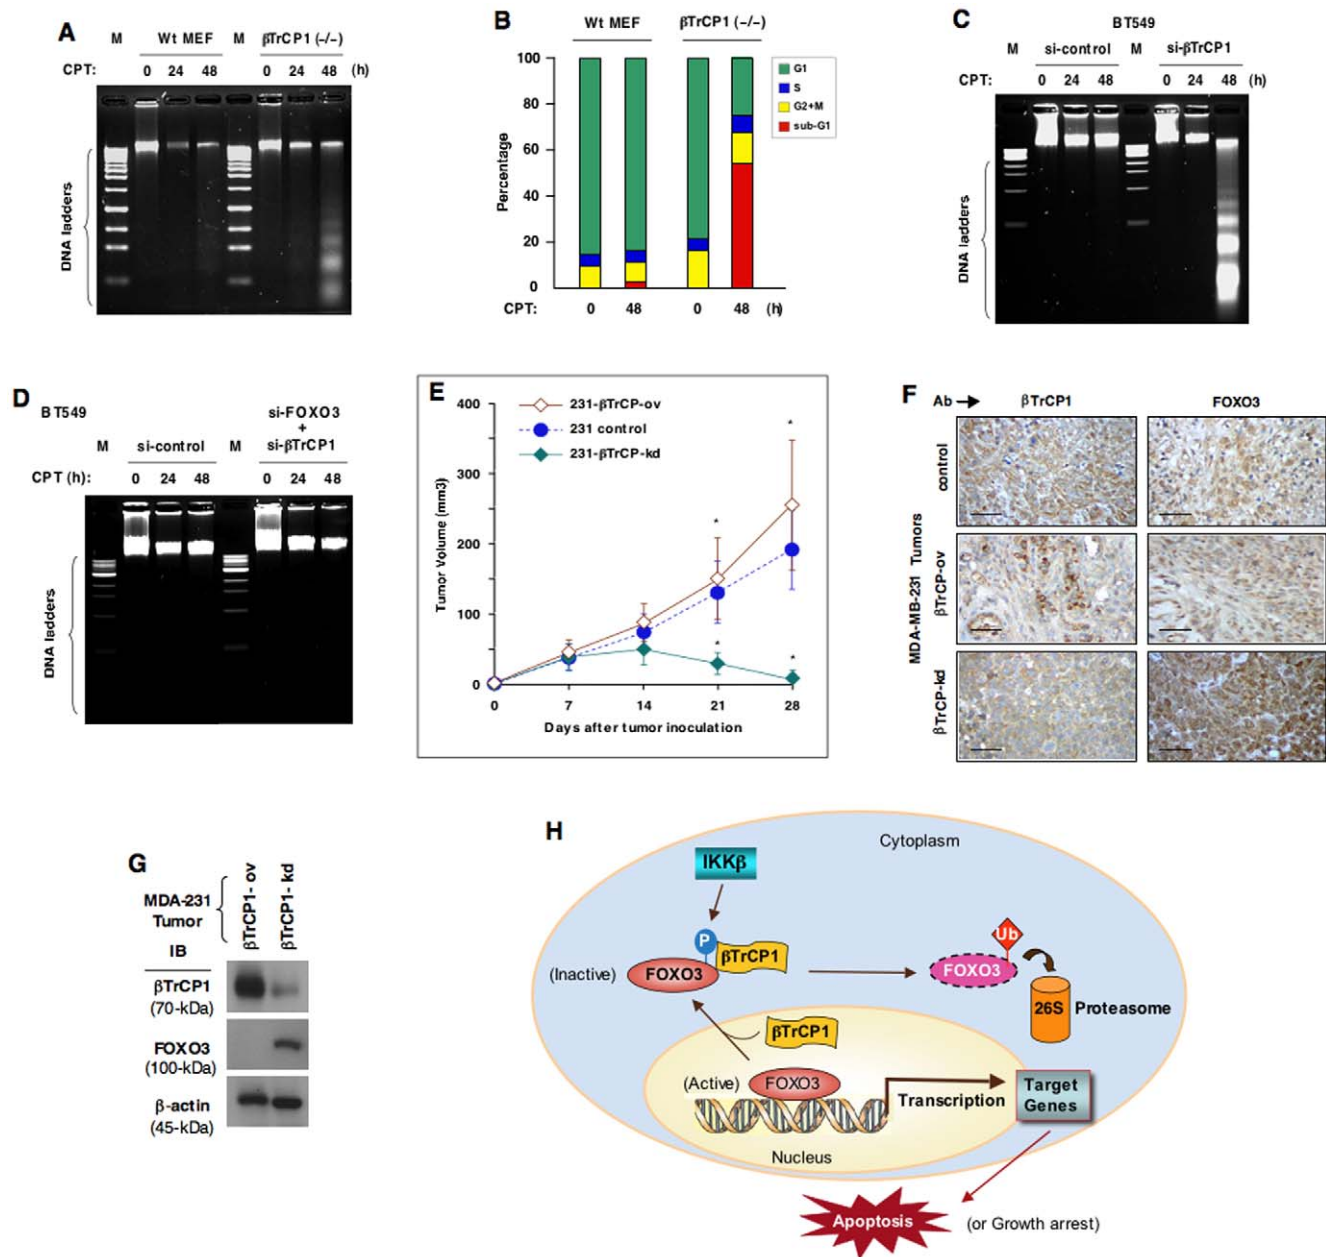

**Figure 4. DNA damage induces apoptosis in cells lacking  $\beta$ TrCP1 that can be reverted by silencing FOXO3 and ectopic expression of  $\beta$ TrCP1 promotes tumor growth whereas silencing  $\beta$ TrCP1 in cancer cells suppresses tumorigenesis *in vivo*.** (A) DNA samples extracted from Wt MEF or  $\beta$ TrCP1(-/-) MEF cells treated with camptothecin (CPT) (20  $\mu$ M) for 24 or 48 h or control (DMSO) were subjected to DNA fragmentation assay. Equal amounts of the extracted DNA (2  $\mu$ g/lane) and size markers (M) were subjected to electrophoresis on 2% agarose gels, which were stained with ethidium bromide and photographed. (B) MEF cells treated with CPT (20  $\mu$ M) or DMSO (control) (0 h) for 48 h were stained with propidium iodide (PI), and the cell-cycle profiles were determined by flow cytometry. The changes in percentage of cell-cycle statuses between CPT treatment and control were shown in a histogram. (C) BT549 cells were transfected with  $\beta$ TrCP1-siRNA (si- $\beta$ TrCP1) or control RNA (si-control). DNA fragmentation assay was performed as described above. (D) BT549 cells were transfected with control RNA (si-control) alone or transfected with FOXO3-siRNA (si-FOXO3) plus  $\beta$ TrCP1-siRNA (si- $\beta$ TrCP1). DNA fragmentation assay was performed. (E) The 231 cells were transfected with  $\beta$ TrCP1-siRNA (designated 231- $\beta$ TrCP-kd) or transfected with a  $\beta$ TrCP1 expression vector (designated 231- $\beta$ TrCP-ov). These transfected cells or 231 control cells were injected into the nude mice as described. \*,  $P < 0.05$  between 231 control versus 231- $\beta$ TrCP-kd or 231- $\beta$ TrCP-ov. (F) At 28 days after tumor cell implantation, breast tumors derived from the nude mice bearing 231 (control) or 231- $\beta$ TrCP-ov or - $\beta$ TrCP-kd tumors were resected, fixed, sectioned, and placed on slides. Tumor specimens were subjected to immuno-histochemical staining with an Ab specific to  $\beta$ TrCP1 or FOXO3. Slides were examined at 40 $\times$  magnification with a microscope and representative fields are shown. Scale bars indicate 50  $\mu$ m. (G) Total lysates prepared from 231- $\beta$ TrCP-ov and 231- $\beta$ TrCP-kd breast tumor specimens were subjected to IB analysis with Abs against FOXO3,  $\beta$ TrCP1, and  $\beta$ -actin (loading control). (H) A diagram depicts the role of  $\beta$ TrCP1 in promoting tumorigenesis through inducing degradation of FOXO3 protein. The subcellular localization of FOXO3 is shown to denote FOXO3 activity.

doi:10.1371/journal.pone.0011171.g004

knockdown after exposure to CPT (Figure 4C,D), suggesting that the effect of silencing  $\beta$ TrCP1 on the observed apoptosis increase is mediated through FOXO3.

We sought to determine whether silencing endogenous  $\beta$ TrCP1 expression could augment FOXO3 protein level and lead to tumor suppression *in vivo* and whether ectopic expression of  $\beta$ TrCP1 could reduce FOXO3 protein level and promote tumor growth in an orthotopic breast tumor mouse model. When the MDA-MB-231 (abbreviated as 231) cells with  $\beta$ TrCP1-knockdown (231- $\beta$ TrCP-kd) or 231 control cells were injected into the mammary fat pads of female athymic nude mice, the tumor growth of 231- $\beta$ TrCP-kd was strongly suppressed as compared to that of 231 control cells (Figure 4E). This tumor suppression phenotype is presumably caused by elevation of FOXO3 that promotes apoptosis. In contrast, when the cells over-expressing  $\beta$ TrCP1 (231- $\beta$ TrCP-ov) were injected into nude mice in the same fashion, the growth rate of 231- $\beta$ TrCP-ov cells was enhanced as compared to that of 231 control cells (Figure 4E). This growth increase is presumably induced by the  $\beta$ TrCP1-mediated FOXO3 degradation as described above. Using immunohistochemical staining and IB analysis, we confirmed that the level of FOXO3 was indeed inversely correlated with the expression level of  $\beta$ TrCP1 in the xenograft tumor samples (Figure 4F,G). Because 231 cells are tumorigenic in nude mice and the level of endogenous FOXO3 in 231 cells is low, over-expression of  $\beta$ TrCP1 in 231 cells (231- $\beta$ TrCP-ov) could only further reduce FOXO3 protein level slightly. Therefore, the tumor growth rate of 231- $\beta$ TrCP-ov cells in mice could be enhanced only partially as compared to that of 231 control cells (Figure 4E).

We have demonstrated a novel mechanism underlying the Ub-mediated degradation of FOXO3 protein in tumorigenesis. Our findings indicate that  $\beta$ TrCP1 interacts with FOXO3, resulting in promoting Ub-mediated degradation of FOXO3 protein that contributes to tumor growth. This is the first time that  $\beta$ TrCP1 is shown to regulate FOXO3 protein degradation and its tumor suppressor function. Based on these findings, we propose a model for a unique role of  $\beta$ TrCP1 in regulating FOXO3 protein degradation and promoting tumorigenesis (Figure 4H). These findings suggest that cancer cells may acquire sustained resistance to FOXO3-mediated apoptosis through a regulated degradation of FOXO3 protein by  $\beta$ TrCP1 oncogenic E3-ligase. Evidence is emerging to indicate that certain key substrates are targeted by the E3 ligases in the Ub-mediated protein regulation [28]. In addition to FOXO3, it is intriguing that  $\beta$ TrCP1 has been found to interact with another key tumor suppressor p53 [29] and promote its Ub-dependent degradation, resulting in tumorigenesis. Our findings that a unique oncogenic  $\beta$ TrCP1 E3-ligase mediates augmented degradation of FOXO3 protein will significantly contribute to an understanding of the control of FOXO3 protein stability and extend the parallel mechanism of regulation between FOXO3 and p53 in cancer cells. Moreover, this dual inhibition of FOXO3 and p53 tumor suppressor function by  $\beta$ TrCP1 suggests that compounds inhibiting  $\beta$ TrCP1 protein may be innovative therapeutic modalities for suppression of tumor growth and the development of cancer.

## Materials and Methods

### Ethics Statement

All experiments involving mice were approved by the institutional review boards of Stanford University and Albert Einstein College of Medicine. All research involving animals were conducted according to the guidelines of Institutional Animal Care and Use Committees of Stanford University and Albert Einstein

College of Medicine. The injected mice were housed in groups, which were provided with food and sterile water. When bedding was contaminated, the mice were transferred into clean cage first and the contaminated bedding was discarded according to Institutional guidelines. There was no change after the appearance of tumors and no nesting material was provided for these mice. The mice were checked daily including weekend.

### Antibodies and reagents

Antibodies (Abs) specific to FOXO3 (FKHRL1, H-144; and N-16), IKK $\beta$ , p-IkB $\alpha$ , IkB $\alpha$ , and  $\beta$ TrCP2 were purchased from Santa Cruz Biotechnology (Santa Cruz, CA). A specific anti-FOXO3 Ab was obtained from Imgenex Corp. Abs against  $\beta$ -tubulin,  $\beta$ -actin, hemagglutinin (HA), myc-tag and Flag-tag were purchased from Sigma. An anti- $\beta$ TrCP1 was obtained from Zymed Laboratories, Inc. (San Francisco, CA). An anti-p27Kip1 Ab was purchased from BD PharMingen (San Diego, CA). Abs against myc-tag (9E10) and poly-ADP-ribose polymerase (PARP) was purchased from Roche Applied Science (Indianapolis, IN), respectively. Additional anti-myc-tag Abs were purchased from Abcam Inc. (Cambridge, MA) and GenScript USA Inc. (Piscataway, NJ). The specific anti- $\beta$ TrCP1 polyclonal Abs [22] were obtained from K. Strebel (at NIH). Alexa 488 (green)- and Alexa 546 or 555 or 594 or 647 (red)-conjugated secondary Abs and Texas red- and FITC-conjugated secondary Abs were obtained from Molecular Probes (Eugene, OR), Invitrogen Corp. An anti-phosphoserine (p-Ser) Ab was purchased from Invitrogen. Camptothecin (CPT) and the proteasome inhibitors such as MG-132, clasto-Lactacystin (c-Lactacystin), MG-101 (also named ALLN or LLNL), and cycloheximide were purchased from Sigma (St. Louis, MO) or Calbiochem (CA), dissolved in DMSO or ethanol and stored in aliquots at  $-80^{\circ}\text{C}$ .

### Cell culture and cell lines

All cell lines were grown under normal conditions at  $37^{\circ}\text{C}$  and 5%  $\text{CO}_2$  in DMEM/F12 supplemented with L-glutamine, penicillin/streptomycin and 10% fetal bovine serum (FBS). The tumor type origins of the cell lines are: MDA-MB-231 and MCF-7, human breast epithelial adenocarcinoma; BT474 and BT549, human breast epithelial ductal carcinoma; 293T, human kidney epithelial cell line expressing SV40 large T antigen. Mouse embryonic fibroblasts (MEF)  $\beta$ TrCP1(−/−) and their control wt MEF cells have been described previously [30].

### Immunoprecipitation (IP) and immunoblotting (IB)

All IP experiments were performed as described previously [17]. Briefly, cells were washed twice with PBS and lysed with lysis buffer containing protease inhibitors at  $4^{\circ}\text{C}$  for 20 min. Total lysates were sonicated extensively for preventing non-specific protein-protein associations. For Ub analysis, the lysates were prepared with lysis buffer under denaturing conditions and sonicated extensively to prevent non-covalent protein-protein associations. Protein samples were first precleared with a nonspecific IgG antibody. Precleared lysates were then incubated with an Ab by rotating at  $4^{\circ}\text{C}$  overnight followed by the addition of 25 ml of 50% protein A- or Protein G-sepharose slurry and rotating for 1 hour. Protein A/G beads were collected and washed with lysis buffer four times. Immunoprecipitates were resolved by 6% or 10% or 12% SDS-polyacrylamide gel electrophoresis (PAGE) and analyzed by IB analysis. After washing, immunoprecipitates were resolved by SDS-PAGE and analyzed by IB analysis. For IB analysis, the protein samples were subjected to SDS-PAGE and transferred onto nitrocellulose or polyvinylidene difluoride (PVDF) membranes. The membranes were blocked

with 5% nonfat dry milk or BSA in PBS containing 0.05% Tween 20 and incubated with primary Abs and then with horseradish peroxidase-conjugated secondary Abs according to the manufacturer's instructions. IB analysis was visualized by an enhanced chemiluminescence (ECL) kit obtained from Pharmacia or Santa Cruz Biotechnology.

### In vitro ubiquitination assays

E3-ligase proteins (GST- $\beta$ TrCP1 and GST- $\beta$ TrCP1 $\Delta$ F) and target proteins (GST (negative control), GST-FO(1–300), and GST-FO(301–673)) were produced as GST-fusion proteins from *E. coli* and purified. In vitro ubiquitination assays were carried out using in vitro ubiquitination assay kit (BIOMOL). In vitro ubiquitination assays were carried out in 50  $\mu$ l of ubiquitylation buffer, containing E1 (100 nM), E2 (UbcH5b, 2.5  $\mu$ M), Mg-ATP (5 mM), E3 (0.1  $\mu$ M), target protein (1  $\mu$ M), inorganic pyrophosphate solution (100 U/ml), DTT (5 mM), Mg-ATP (25 nM), biotinylated ubiquitin (2.5  $\mu$ M), and the cell extracts (5  $\mu$ g protein) from 293T cells over-expression of IKK $\beta$ . The reaction mixtures were incubated for 2 hours at 37°C and then terminated with 2X nonreducing gel loading buffer. The protein samples were subjected to SDS-PAGE (8% gel) and transferred onto nitrocellulose membrane. The membranes were incubated with streptavidin-HRP solution (Vectastain ABC Elite kit) for 1 hour, washed with BSA/TBST (Tris-buffered saline containing 0.05% Tween 20) solution for 1 hour and visualized by chemiluminescence.

### Immunofluorescence (IF)

MEF  $\beta$ TrCP1(–/–) and  $\beta$ TrCP1(+/+ ) cells were seeded onto sterile glass coverslips, which were placed in a 12-well culture plate. Cells were fixed with 4% paraformaldehyde for 10 min at room temperature before being permeabilized in 0.5% Triton X-100. Slide culture chambers were washed with PBS and blocked with PBS containing 2% BSA, incubated with an Ab specific to FOXO3 or  $\beta$ TrCP1 (1:100 to 1:500 dilution), followed by Alexa 546 or 555 or 594 or 647 (red)-conjugated anti-rabbit and Alexa 488 (green)-conjugated anti-mouse secondary Abs (Molecular Probes, Eugene, OR). Cells were counterstained with DAPI (Molecular Probes, Eugene, OR) to show the nuclei. Specific staining was visualized and images were captured with a Leica SP2 AOBS confocal laser scanning microscope or an Olympus IX81 system confocal microscope as described previously [17].

### siRNA transfection

MCF-7 or 293T cells were transfected with specific small-interfering RNA (siRNA) targeting FOXO3 (si-FOXO3a) (5'-GAGCUCUUGGUGGAUCAUC<sub>d</sub>T<sub>d</sub>T-3') or  $\beta$ TrCP1 ( $\beta$ TrCP1 siRNA duplexes were obtained from Dharmacon) or control luc siRNA (5'-CUUACGCUGAGUACUUCGA<sub>d</sub>T<sub>d</sub>T-3') duplex (Dharmacon) (4  $\mu$ M/2 $\times$ 10<sup>6</sup> cells) by electroporation using Nucleofector 1 (amaxa) or Lipofectamine 2000 (Invitrogen Corp.) as described previously [17]. The control vector (without shRNA), the scrambled shRNA control vector, and the  $\beta$ TrCP1-shRNAs vectors were purchased from OriGene Technologies, Inc. (Rockville, MD).

### DNA fragmentation Assay

DNA fragmentation in apoptotic cells was determined by the standard gel electrophoresis. Cells were treated with the indicated drugs or control for 24 or 48 hours, harvested, washed with PBS, and incubated with lysis buffer on ice for 20 min. Samples were then centrifuged at 4°C at 12,000 $\times$ g for 30 min. DNA was extracted with phenol/chloroform and precipitated with ethanol.

The DNA pellet was then washed with 70% ethanol, dissolved in water containing RNase, and incubated at 37°C for 30 minutes. The extracted DNA (2  $\mu$ g/lane) was subjected to electrophoresis on 2% agarose gels, stained with ethidium bromide, and then photographed.

### Cell cycle analysis

Wild type (Wt) and  $\beta$ TrCP1(–/–) MEF cells were treated with CPT (20  $\mu$ M) or control (DMSO) for 5 hours. Cells were rinsed with PBS and fixed in 70% ethanol at 4°C overnight. The fixed cells were then washed twice with PBS and resuspended in PBS containing 10  $\mu$ g/ml PI (Roche Applied Science) and 10  $\mu$ g/ml RNase A (Sigma), and incubated for 1 hour at room temperature before analysis. The samples were analyzed by flow cytometry as described previously [17]. Cell populations in different phases of cell cycle were determined.

### GST pull-down assays

For GST pull-down assays: the various GST-fusion FOXO3 plasmids containing the specific domains of FOXO3 (GST-FO-(1–301), (301–673), (301–346), (347–392), (393–439), (440–485), (486–531), (532–578), (579–625), and (626–673)) were prepared. The various GST-fusion FOXO3 expression vectors were constructed as described previously [17]. Briefly, the GST-FO fusion proteins and GST proteins (control) were expressed in *Escherichia coli* BL21 (Invitrogen, Carlsbad, CA) lysed in a GST lysis buffer (50 mM Tris, pH 7.5, 150 mM NaCl, 1% Triton X-100, and protease inhibitors), and immobilized onto glutathione-Sepharose beads (Pharmacia Biotech). Total lysate (1 mg) from 293T cells that were transfected with IKK $\beta$  or treated with TNF $\alpha$  (10 ng/ml) in binding buffer (50 mM Tris, pH 7.5, 100 mM NaCl, 10 mM MgCl<sub>2</sub>, 0.5% Nonidet P-40 and protease inhibitors) was mixed with the GST-FO or GST (control) containing glutathione-Sepharose beads. The protein complex formation on glutathione-Sepharose beads was carried out overnight at room temperature or 4°C with shaking. The beads were washed with binding buffer, and the bound protein complexes were disrupted and proteins were denatured directly by boiling in SDS loading buffer.

### Immunohistochemical staining and statistical analysis

Immunohistochemical staining was performed as described previously [17]. Breast tumors were excised from the tumor-bearing mice 28 days (231-control, 231- $\beta$ TrCP-ov, and 231- $\beta$ TrCP-kd tumors) after inoculation of the test or control cells. Five independent tumors (each from a different mouse) were taken from each test group for testing. Tumor samples were fixed in formalin, sectioned, placed on slides, and incubated with specific Abs. Sections were then treated with biotin-conjugated secondary Ab followed by avidin biotin-peroxidase complex and amino-ethyl carbazole as a chromogen. All data are expressed as means and standard deviations (SD) from at least three determinations. The statistical significance of differences in cell proliferation and tumor growth between two groups was analyzed with two-sided unpaired Student's *t* tests when the variances were equal, or with Welch's corrected *t* tests when the variances were unequal, with Graphpad statistical software (San Diego, CA). All statistical tests were two-sided, and P values less than 0.05 were considered statistically significant.

### Animal studies

To determine tumorigenicity and establish orthotopic breast cancer animal models, female athymic (*nu/nu*) nude mice were

purchased from the NCI Frederick Cancer Research Center (Frederick, MD) or NCR NU-M-F (Taconic Farm) and maintained aseptically in an athymic animal room. For tumor-cell implantation, cells (derivatives of MDA-MB-231 (231-control, 231- $\beta$ TrCP1-ov, and 231- $\beta$ TrCP1-kd)) in log-phase growth were harvested, washed with phosphate buffered saline (PBS), and resuspended in PBS. Then cells ( $2 \times 10^6$  in 0.1 ml PBS) were injected into the mammary fat pad of each mouse. The tumor sizes were measured twice per week with a Vernier caliper. Data are presented as means and standard deviations of two experiments with 5 mice in each group. All procedures were performed in compliance with guidelines of Institutional Animal Care and Use Committee.

## Supporting Information

**Figure S1** Ectopic expression of  $\beta$ TrCP1 decreases FOXO3 protein level that can be reverted by treating cells with proteasome inhibitors. (A) Total lysates from 293T cells that were cotransfected with FOXO3-Flag plus  $\beta$ TrCP1, treated with the proteasome inhibitor MG-132 or clastro-Lactacystin (c-Lactacystin) or DMSO (vehicle control), were analyzed by immunoblotting (IB) with an indicated antibody (Ab).  $\beta$ -actin was used to show the protein loading control. (B) The effect of overexpression of wild-type (wt) and mutant  $\beta$ TrCP1 on the levels of FOXO3 protein. Total lysates of 293T cells that were cotransfected with a control vector (pcDNA3.1) or FOXO3-Flag alone or FOXO3-Flag plus wt  $\beta$ TrCP1-myc or the mutant  $\beta$ TrCP1 $\Delta$ F-myc (E3 mutant) vector as denoted, treated with MG-132 or DMSO, and untransfected 293T cells (negative control, the far left lane), were analyzed by IB analysis with an indicated Ab as described above. The molecular weights (kDa) of proteins are highlighted. Found at: doi:10.1371/journal.pone.0011171.s001 (3.00 MB TIF)

**Figure S2**  $\beta$ TrCP1 is associated with FOXO3 in cells over-expressing these proteins *in vivo*. (A) Total lysates of 293T cells cotransfected with hemagglutinin (HA)-tagged FOXO3 plus a myc-tagged  $\beta$ TrCP1 or mutant  $\beta$ TrCP1 $\Delta$ F, and IKK $\beta$  or an empty vector were analyzed by immuno-precipitation (IP) with an anti-myc tag antibody (Ab) followed by immunoblotting (IB) with an anti-HA Ab. (B) The same lysates as described in A were subjected to reciprocal IP with an anti-HA followed by IB with an anti-myc Ab. IB analysis for FOXO3 or myc- $\beta$ TrCP or  $\beta$ -actin with the indicated Ab was shown as a control of protein input before IP. (C) Total lysates of 293T cells cotransfected with FOXO3-Flag and IKK $\beta$ , treated with c-Lactacystin or MG-101 (also named ALLN or LLNL) or DMSO, were analyzed by IB with an anti-Flag or anti- $\beta$ -actin Ab (loading control). Found at: doi:10.1371/journal.pone.0011171.s002 (0.15 MB TIF)

**Figure S3** The IKK $\beta$  inhibitor significantly represses IKK $\beta$  activity and overrides the IKK $\beta$ -mediated FOXO3 degradation;  $\beta$ TrCP1-shRNAs significantly reduce  $\beta$ TrCP1 expression in transfected cells. (A, B) 293T cells were treated with an equal amount of DMSO (control vehicle) (A) or IKK $\beta$  inhibitor (B) under normal cell culture conditions. Four hours after treatment, cells were washed, fixed, and stained with antibodies (Abs) against IKK $\beta$  and phospho-IkB (p-IkB) and followed by the Alexa Fluor 488 (green)- and Alexa Fluor 647 (red)-conjugated secondary Abs, respectively, and fluorescence microscopy. A nuclear stain 4',6-diamidino-2-phenylindole (DAPI) was used to show the nuclei. Co-localizations between IKK $\beta$  and p-IkB images are shown as the merged yellow/orange images. (C) Total lysates from 293T cells that were transfected with either IKK $\beta$ vector or pcDNA3.1 (control) vector, treated with the IKK $\beta$  inhibitor or DMSO

(control) as indicated, were analyzed by immunoblotting (IB) with an Ab against FOXO3 or IKK $\beta$  or p-IkB or  $\beta$ -actin (as protein loading control). The molecular weights of proteins are highlighted. (D) Over-expression of  $\beta$ TrCP1-shRNAs silenced endogenous  $\beta$ TrCP1 expression in the transfected cells. 293T cells were co-transfected with the control vector (without shRNA) or the scrambled shRNA control vector or the  $\beta$ TrCP1-shRNAs vectors. At 48 hours post transfection, total lysates were prepared from the transfected cells and subjected to IB analysis with an Ab against  $\beta$ TrCP1 or  $\beta$ -actin (loading control) as described above. Found at: doi:10.1371/journal.pone.0011171.s003 (0.72 MB TIF)

**Figure S4** Ectopic expression of  $\beta$ TrCP1 increases FOXO3 protein degradation; the test cell lines express similar levels of endogenous IKK $\beta$  protein. (A) The 293T cells were cotransfected with FOXO3-myc plus  $\beta$ TrCP1-myc and IKK $\beta$  and followed by cycloheximide (CHX) chase (100  $\mu$ g/ml) at 2, 4, 6, and 8 hour. Total lysates of these cells were analyzed by IB with an anti-myc (detecting FOXO3-myc 100-kDa protein and  $\beta$ TrCP1-myc 70-kDa protein expression control) or anti- $\beta$ -actin antibody (Ab) (loading control). (B-D) MCF-7 cells (B), mouse embryonic fibroblasts (MEF)  $\beta$ TrCP1(+/+) cells (C), and MEF  $\beta$ TrCP1 (-/-) cells (D) were washed, fixed, and stained with an Ab against IKK $\beta$  and followed by the Alexa Fluor 488 (green)-conjugated secondary Ab, and fluorescence microscopy. A nuclear stain 4',6-diamidino-2-phenylindole (DAPI) was used to show the nuclei. Found at: doi:10.1371/journal.pone.0011171.s004 (3.00 MB TIF)

**Figure S5** The candidate protein domains and sequence motifs involved in the interaction between FOXO3 and  $\beta$ TrCP1. (A) A diagram depicts the relative positions of GST-FOXO3 (GST-FO) fusion proteins in the entire carboxy-terminal region of FOXO3 (301–673). The orange color highlights a candidate domain in the GST-FO(579–625) or GST-FO(626–673) fragment that interacts with  $\beta$ TrCP1 significantly in the GST-pull down assays. (B) The putative IKK $\beta$  consensus sequences for phosphorylation (S, serine; T, threonine; and X, any amino acid) in the FOXO3 (579–625) domain are shown, and the new candidate S residues that are phosphorylated by IKK $\beta$  are highlighted by boxes in red dots. Found at: doi:10.1371/journal.pone.0011171.s005 (3.00 MB TIF)

**Figure S6** Subcellular localization of  $\beta$ TrCP1 protein in different cell types. (A) BT-549 breast cancer cells were treated with DMSO, fixed, and the subcellular localizations and co-localization of endogenous FOXO3 and  $\beta$ TrCP1 proteins were detected using antibodies (Abs) against FOXO3 and  $\beta$ TrCP1 and followed by an Alexa Fluor 555- or 488-conjugated secondary Abs, respectively, and fluorescence microscopy. DAPI was used to show the nuclei, and co-localizations of FOXO3 with  $\beta$ TrCP1 images are shown as the merged yellow/orange images. (B, C) Overexpression of  $\beta$ TrCP1-myc in MCF-7 cells (B) and 293T cells (C) confirms the subcellular localizations of  $\beta$ TrCP1-myc. At 48 hours after transfection, cells were fixed and stained with Abs against myc-tag or  $\beta$ TrCP1, a specific Ab that was developed by K. Strebel at NIH as described previously [22], and followed by an Alexa Fluor 647- or 488-conjugated secondary Abs, respectively, and fluorescence microscopy as described above. Found at: doi:10.1371/journal.pone.0011171.s006 (3.00 MB TIF)

**Figure S7** The phosphorylation status of FOXO3 protein in cells over-expressing FOXO3 and IKK $\beta$ . (A, B) 293T cells were co-transfected with FOXO3-HA vector plus control (A) or IKK $\beta$ -Flag (B) vector. Forty-eight hours after transfection, cells were washed, fixed, and stained with antibodies against HA-tag and phosphoserine (p-Ser) and followed by the Alexa Fluor 647 (red)- and Alexa Fluor 488 (green)-conjugated secondary antibodies,

respectively, and fluorescence microscopy. DAPI was used to show the nuclei. Co-localizations between FOXO3-HA and p-Ser images are shown as the merged yellow/orange images. (C, D) MCF-7 cells were co-transfected with FOXO3-myc vector plus control (C) or IKK $\beta$ -Flag (D) vector. Forty-eight hours after transfection, cells were stained with antibodies against myc-tag and p-Ser and followed by secondary antibodies and fluorescence microscopy as described above. Co-localizations between FOXO3-myc and p-Ser images are shown as described.

Found at: doi:10.1371/journal.pone.0011171.s007 (3.00 MB TIF)

**Figure S8** The subcellular localization of mutant FOXO3-S644A protein in cells overexpressed FOXO3-S644A and IKK $\beta$ . (A, B) 293T cells were co-transfected with mutant FOXO3-S644A-myc plus IKK $\beta$ -Flag (A) vectors or FOXO3-S644A-myc alone (B). Forty-eight hours after transfection, cells were washed, fixed, and stained with antibodies (Abs) against myc-tag and Flag-tag and followed by the Alexa Fluor 546 (red)- and Alexa Fluor 488 (green)-conjugated secondary Abs, respectively, and fluorescence microscopy. DAPI was used to show the nuclei. (C, D) MCF-7 cells were co-transfected with wild-type FOXO3-HA plus IKK $\beta$ -Flag vectors (C) or FOXO3-HA alone (D). At 48 hours post transfection, cells were fixed and stained with Abs against myc-tag and Flag-tag and followed by secondary Abs and fluorescence microscopy as described above. Co-localizations between FOXO3-HA and IKK $\beta$ -Flag images are shown as the merged yellow/orange images.

Found at: doi:10.1371/journal.pone.0011171.s008 (3.00 MB TIF)

## References

- Burgering BM, Kops GJ (2002) Cell cycle and death control: long live Forkheads. *Trends Biochem Sci* 27: 352–360.
- Tran H, Brunet A, Griffith EC, Greenberg ME (2003) The Many Forks in FOXO's Road. *Sci STKE* 172: re5.
- Hu MC, Lee DF, Xia W, Golfman LS, Ou-Yang F, et al. (2004) I $\kappa$ B kinase promotes tumorigenesis through inhibition of forkhead FOXO3a. *Cell* 117: 225–237.
- Hosaka T, Biggs WH, 3rd, Tieu D, Boyer AD, Varki NM, et al. (2004) Disruption of forkhead transcription factor (FOXO) family members in mice reveals their functional diversification. *Proc Natl Acad Sci USA* 101: 2975–2980.
- Greer EL, Brunet A (2005) FOXO transcription factors at the interface between longevity and tumor suppression. *Oncogene* 24: 7410–7425.
- Vogt PK, Jiang H, Aoki M (2005) Triple layer control: phosphorylation, acetylation and ubiquitination of FOXO proteins. *Cell Cycle* 4: 908–913.
- Arden KC (2008) FOXO animal models reveal a variety of diverse roles for FOXO transcription factors. *Oncogene* 27: 2345–2350.
- Arden KC (2007) FoxOs in tumour suppression and stem cell maintenance. *Cell* 128: 235–237.
- Paik JH, Kollipara R, Chu G, Ji H, Xiao Y, et al. (2007) FoxOs are lineage-restricted redundant tumour suppressors and regulate endothelial cell homeostasis. *Cell* 128: 309–323.
- Miyamoto K, Araki KY, Naka K, Arai F, Takubo K, et al. (2007) FOXO3 is essential for maintenance of the hematopoietic stem cell pool. *Cell Stem Cell* 1: 101–112.
- Tothova Z, Kollipara R, Huntly BJ, Lee BH, Castrillon DH, et al. (2007) FoxOs are critical mediators of hematopoietic stem cell resistance to physiologic oxidative stress. *Cell* 128: 325–339.
- Furukawa-Hibi Y, Kobayashi Y, Chen C, Motoyama N (2005) FOXO transcription factors in cell-cycle regulation and the response to oxidative stress. *Antioxid Redox Signal* 7: 752–760.
- Alvarez B, Martinez AC, Burgering BM, Carrera AC (2001) Forkhead transcription factors contribute to execution of the mitotic programme in mammals. *Nature* 413: 744–747.
- Kops GJ, Medema RH, Glassford J, Essers MA, Dijkers PF, et al. (2002) Control of cell cycle exit and entry by protein kinase B-regulated forkhead transcription factors. *Nature* 419: 316–321.
- Tran H, Brunet A, Grenier JM, Datta SR, Fornace AJ, Jr., et al. (2002) DNA repair pathway stimulated by the forkhead transcription factor FOXO3 through the Gadd45 protein. *Science* 296: 530–534.
- Huang H, Regan KM, Lou Z, Chen J, Tindall DJ (2006) CDK2-dependent phosphorylation of FOXO1 as an apoptotic response to DNA damage. *Science* 314: 294–297.
- Tsai WB, Chung YM, Takahashi Y, Xu Z, Hu MC (2008) Functional interaction between FOXO3 and ATM regulates DNA damage response. *Nat Cell Biol* 10: 460–467.
- Brunet A, Bonni A, Zigmond MJ, Lin MZ, Juo P, et al. (1999) Akt promotes cell survival by phosphorylating and inhibiting a Forkhead transcription factor. *Cell* 96: 857–868.
- Fu Z, Tindall DJ (2008) FOXOs, cancer and regulation of apoptosis. *Oncogene* 27: 2312–2319.
- Fuchs SY (2002) The role of ubiquitin-proteasome pathway in oncogenic signaling. *Cancer Biol Ther* 1: 337–341.
- Mani A, Gelmann EP (2005) The ubiquitin-proteasome pathway and its role in cancer. *J Clin Oncol* 23: 4776–4789.
- Margottin F, Bour SP, Durand H, Selig L, Benichou S, et al. (1998) A novel human WD protein, h- $\beta$ TrCP, that interacts with HIV-1 Vpu connects CD4 to the ER degradation pathway through an F-box motif. *Mol Cell* 1: 565–574.
- Yaron A, Hatzubai A, Davis M, Lavon I, Amit S, et al. (1998) Identification of the receptor component of the I $\kappa$ B $\alpha$ -ubiquitin ligase. *Nature* 396: 590–594.
- Cenciarelli C, Chiau DS, Guardavaccaro D, Parks W, Vidal M, et al. (1999) Identification of a family of human F-box proteins. *Curr Biol* 9: 1177–1179.
- Kitagawa M, Hatakeyama S, Shirane M, Matsumoto M, Ishida N, et al. (1999) An F-box protein, FWD1, mediates ubiquitin-dependent proteolysis of  $\beta$ -catenin. *EMBO J* 18: 2401–2410.
- Fuchs SY, Spiegelman VS, Kumar KG (2004) The many faces of beta-TrCP E3 ubiquitin ligases: reflections in the magic mirror of cancer. *Oncogene* 23: 2028–2036.
- Seo E, Kim H, Kim R, Yun S, Kim M, et al. (2009) Multiple isoforms of  $\beta$ -TrCP display differential activities in the regulation of Wnt signaling. *Cell Signal* 21: 43–51.
- Conaway RC, Brower CS, Conaway IW (2002) Emerging roles of ubiquitin in transcription regulation. *Science* 296: 1254–1258.
- Xia Y, Padre RC, De Mendoza TH, Bottero V, Tergaonkar VB, et al. (2009) Phosphorylation of p53 by I $\kappa$ B kinase 2 promotes its degradation by  $\beta$ -TrCP. *Proc Natl Acad Sci USA* 106: 2629–2634.
- Nakayama K, Hatakeyama S, Maruyama S, Kikuchi A, Onoé K, et al. (2003) Impaired degradation of inhibitory subunit of NF- $\kappa$ B (I $\kappa$ B) and  $\beta$ -catenin as a result of targeted disruption of the  $\beta$ -TrCP1 gene. *Proc Natl Acad Sci USA* 100: 8752–8757.

**Figure S9**  $\beta$ TrCP2 does not bind FOXO3 protein significantly *in vitro* and *in vivo*. (A) GST-pull down *in vitro* assays. Whole lysates from 293T cells overexpression of IKK $\beta$  were incubated with the GST-FOXO3 [GST-FO (1–300) and GST-FO (301–673)] fusion proteins as indicated and GST alone (negative control), and analyzed by SDS-PAGE and immunoblotting with an anti- $\beta$ TrCP2 antibody (Ab) (upper panel) and an anti-GST Ab (lower panel) as protein controls. (B) Co-localization between endogenous  $\beta$ TrCP2 and FOXO3 in HeLa cells. Cells cultured under normal conditions were stained with Abs against FOXO3 and  $\beta$ TrCP2 and followed by an Alexa Fluor 594 (red)- and Alexa Fluor 488 (green)-conjugated secondary Abs, respectively, and fluorescence microscopy. DAPI was used to show the nuclei. No significant co-localization (the merged yellow images) between endogenous FOXO3 with  $\beta$ TrCP2 was detected.

Found at: doi:10.1371/journal.pone.0011171.s009 (3.00 MB TIF)

## Acknowledgments

We thank K. Strebel for the specific anti- $\beta$ TrCP1 polyclonal Abs [22], K.C. Arden, Z.J. Chen, and H. Lu for providing DNA reagents, P.C. Li and A. Scott for technical assistance, and M. Denslow for editing the manuscript.

## Author Contributions

Conceived and designed the experiments: WBT YMC MCTH. Performed the experiments: WBT YMC YZ SHP ZX MCTH. Analyzed the data: WBT YMC YZ SHP MCTH. Contributed reagents/materials/analysis tools: YMC ZX KN MCTH. Wrote the paper: YMC SHL MCTH.
